## A common trafficking route for GLUT4 in cardiomyocytes in response to insulin, contraction and energy-status signalling

Daniel J. Fazakerley<sup>1</sup>, Scott P. Lawrence<sup>1</sup>, Vladimir A. Lizunov<sup>2</sup>, Samuel W. Cushman<sup>3</sup> and Geoffrey D. Holman<sup>1,\*</sup>

<sup>1</sup>Department of Biology and Biochemistry, University of Bath, Claverton Down, Bath BA2 7AY, UK

<sup>2</sup>Laboratory of Cellular and Molecular Biophysics, Program on Physical Biology, Eunice Kennedy Schriver National Institute of Child Health and Human Development, National Institutes of Health, Bethesda, MD, 20892, USA

<sup>3</sup>Diabetes Branch, NIDDK, National Institutes of Health, Bethesda, MD 20892, USA

\*Author for correspondence (e-mail: g.d.holman@bath.ac.uk)

*Journal of Cell Science* 122, 1054 (2009) doi:10.1242/jcs.050997

There was an error published in *J. Cell Sci.* **122**, 727-735.

The affiliation of Vladimir A. Lizunov was incorrect in the original version of this paper. The correct affiliation details of all authors are shown above.

The authors also wish to acknowledge that the research was supported in part by the Intramural Research Program of the NIH, NIDDK and NICHD.

The authors apologise for these mistakes.
